# Supplementary material
Source: PubMed Central journal article supplement (PMC2812428)

**Table 1S. Distribution of P-Smad2 staining scores in SCC, by patient age, gender, OTR status and relative sun exposure of body site.**

| Patient Feature   | P-Smad2 expression levels in SCC |          |          |       | P-value, $\chi^2$ |
|-------------------|----------------------------------|----------|----------|-------|-------------------|
|                   | Low                              | Medium   | High     | Total |                   |
| <b>Age</b>        |                                  |          |          |       |                   |
| < 70              | 31 (36%)                         | 27 (31%) | 28 (32%) | 86    | 0.241             |
| > 70              | 30 (39%)                         | 30 (39%) | 16 (21%) | 76    |                   |
| <b>Gender</b>     |                                  |          |          |       |                   |
| Male              | 48 (40%)                         | 40 (33%) | 33 (27%) | 121   | 0.941             |
| Female            | 13 (33%)                         | 15 (25%) | 11 (28%) | 39    |                   |
| <b>OTR Status</b> |                                  |          |          |       |                   |
| Non-OTR           | 39 (47%)                         | 30 (36%) | 13 (16%) | 82    | < 0. 001          |
| OTR               | 22 (27%)                         | 27 (33%) | 32 (39%) | 81    |                   |
| <b>Tumor Site</b> |                                  |          |          |       |                   |
| Sun-protected     | 26 (43%)                         | 21 (35%) | 13 (21%) | 60    | 0.486             |
| Sun-exposed       | 35 (36%)                         | 34 (34%) | 29 (30%) | 98    |                   |

\* Sun-protected areas are defined as the trunk, arms, legs and feet regions. Sun-exposed areas are defined as head, neck, wrist and hand regions. The differences between the groups were tested by  $\chi^2$  analysis.

**Figure 1S. Spectrum of OTR drug regimens.** Venn diagrams indicate the range of drug cocktails that patients received for at least 6 months prior to each skin lesion excision. Number represent individual tissue samples (in some cases this included adjacent non-lesional skin). A) Patients did not receive mycophenolic acid treatment prior to lesion excision; B) Patients were also receiving mycophenolic acid therapy prior to lesion excision.

**Figure 2S. Age distributions in non-OTR versus OTR patients with SCC.** a) Boxplots show median age (horizontal line in box) and interquartile range (25th to 75th percentile) for OTR and non-OTR patients. The mean age in the non-OTR group is 75 years with standard deviation of 13. OTR group had a mean age of 59 years with a standard deviation of 11. There was a significant difference between age groups ( $P < 0.001$ , T-test). b) P-Smad2 staining intensity data are plotted as dots. Locally weighted linear regression (LOWESS) fits P-Smad2 staining intensity as a function of patient age. When intensity was regressed on age for each type of tumor (OTR or non-OTR) neither was significant ( $P = 0.84$  for OTR and  $P = 0.90$  for Non-OTR). Thus, the age difference shown in Figure 2Sa does not significantly affect stain intensity in the two patient categories, OTR and non-OTR.

**Figure 3S. P-Smad2 staining is reduced in SCCs compared to adjacent non-lesional skin.** Non-lesional skin (a), its adjacent SCC (b) and a less differentiated SCC (c), stained with the anti-P-Smad2 antibody. Unstained haematoxylin positive nuclei in (b) and (c) are infiltrating leukocytes (Arrow). Arrow heads point to carcinoma cell nuclei that are strongly P-Smad2 positive. (d) and (e) show low power images of these SCCs and their adjacent skins (thin arrows) to illustrate the differential in P-Smad-2 staining from skin and tumor. Thick

arrow indicates position of core punched out for microarray. Boxes in (d) and (e) indicate relative positions of images captured in a-c.

**Figure 4S. TGF- $\beta$ 2 and TGF- $\beta$ 3 levels are similar in SCC and non-lesional skins**

**samples from OTRs and non-OTRs.** Tissue microarrays were stained for TGF- $\beta$ 2 and

TGF- $\beta$ 3. A) and B) show representative images of distinct cores at A)  $\times 10$  and B)  $\times 40$

magnifications. C) Individual cores were scored as to staining intensity. The percentage of

samples in each staining category was plotted for OTRs and non-OTRs. The number of

independent patient specimens contributing to the data is shown on the x axis. There were no

and significant differences between OTRs and non-OTRs.

**A) No mycophenolic acid**

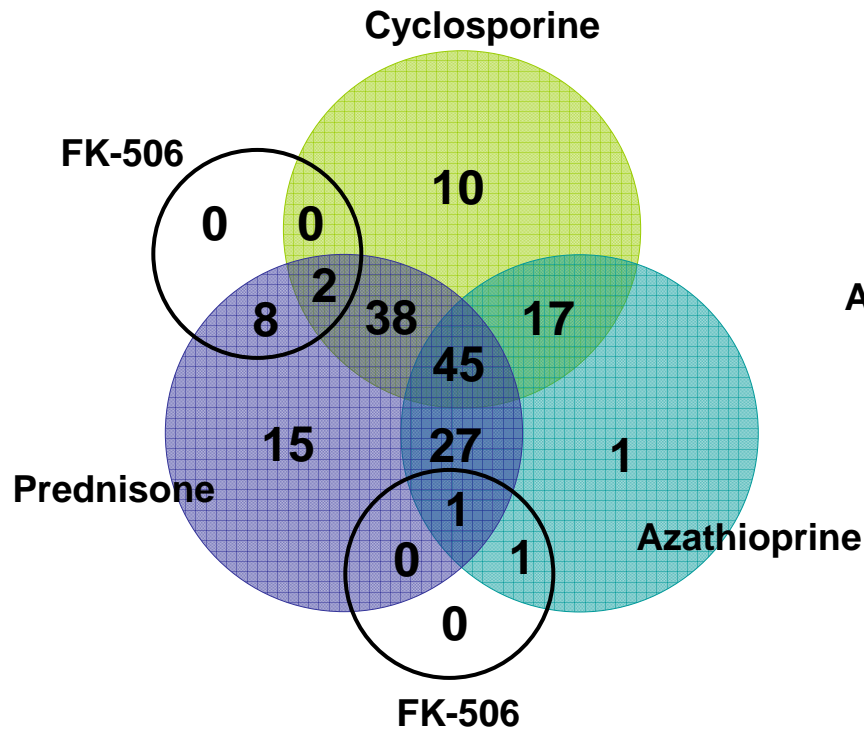

**B) Plus mycophenolic acid**

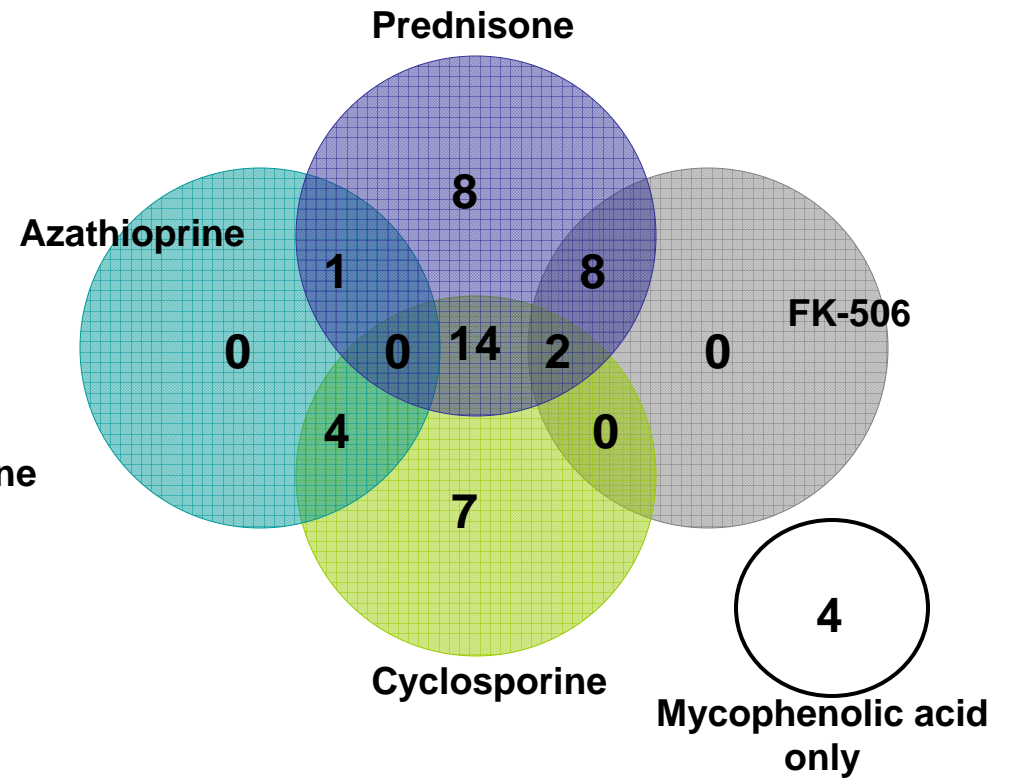

Harradine et al. Figure 2S.

a.

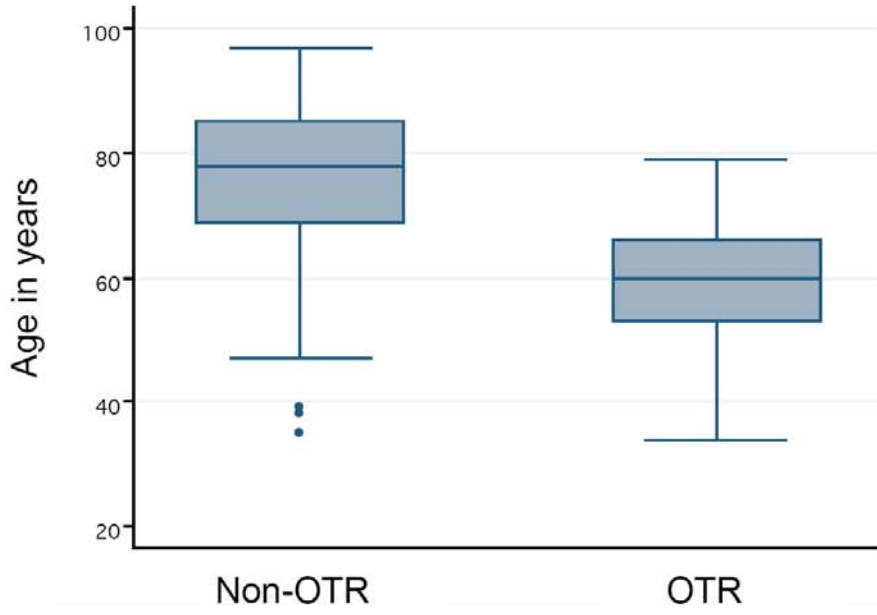

b.

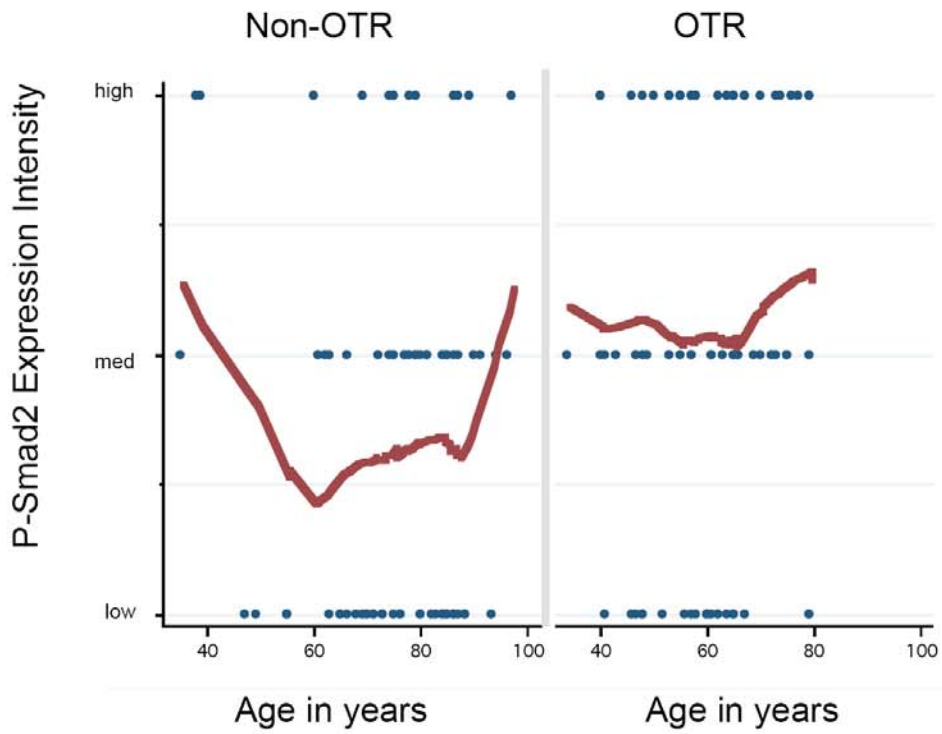

Supplementary Figure S3 Harradine et al

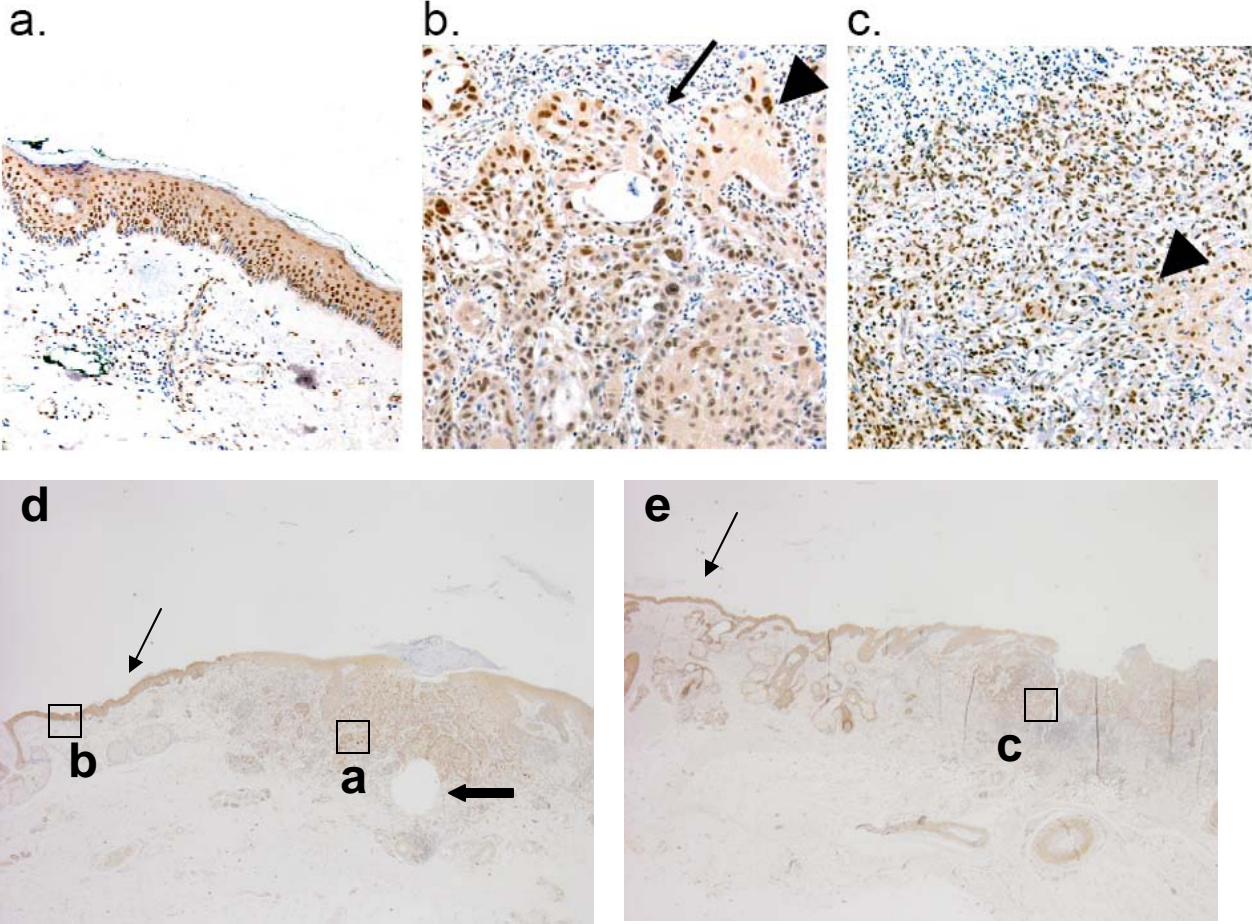

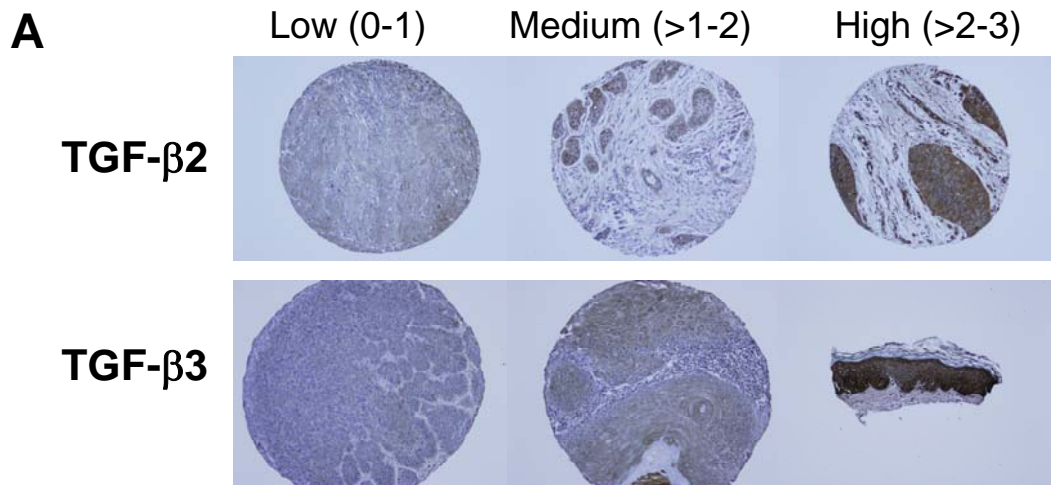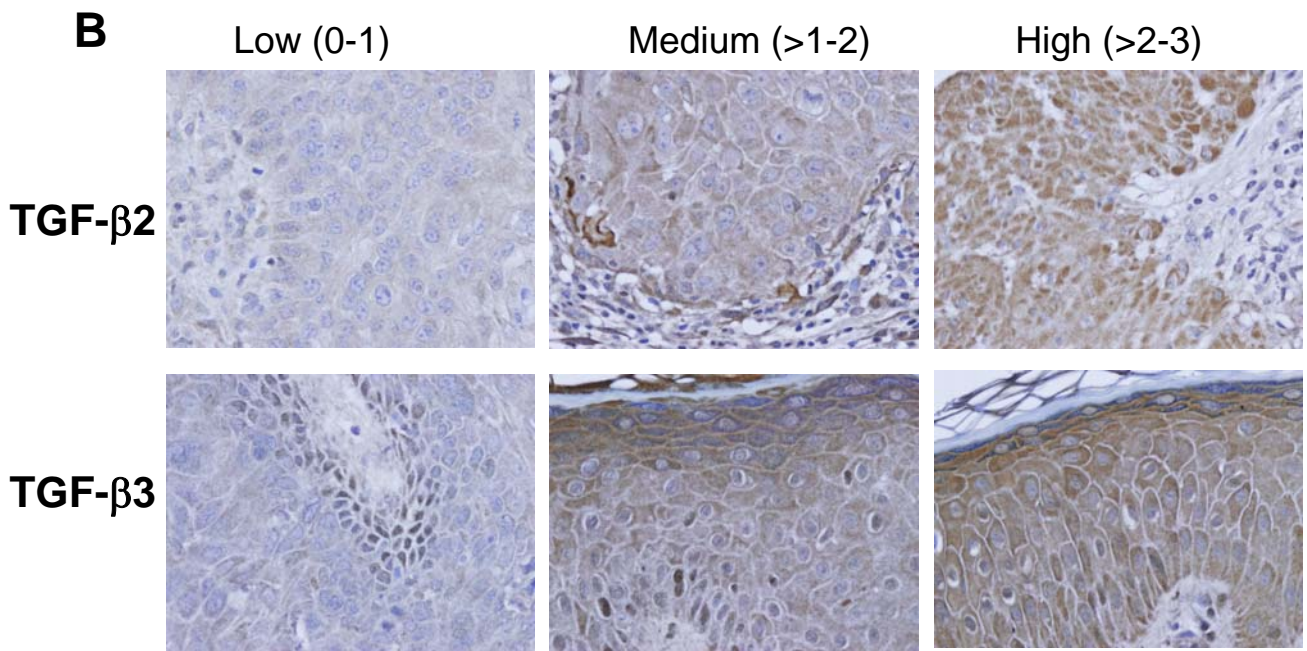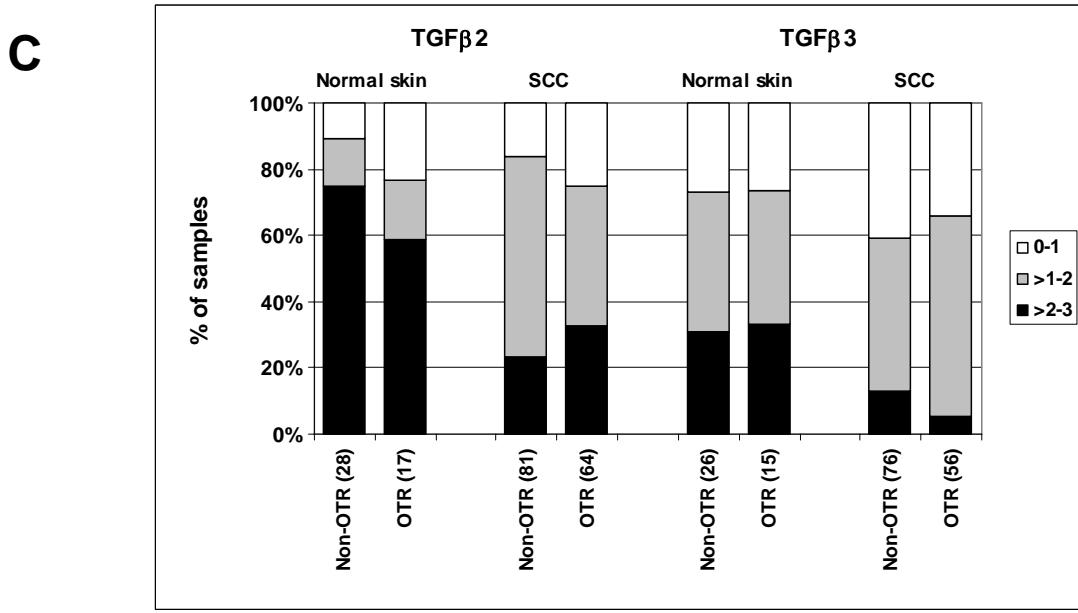

Supplement: NIHMS168644-supplement-supplement_1.pdf [file NIHMS168644-supplement-supplement_1.pdf]
